# Supplementary material
Source: PubMed Central journal article supplement (PMC7610364)

**Figure 4c**

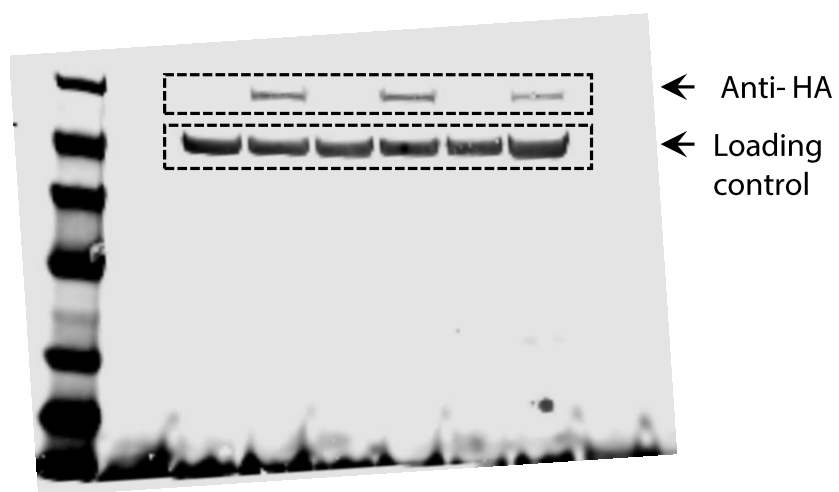

Supplement: EMS118381-supplement-Raw_data__Figure_4C___WB.pdf [file EMS118381-supplement-Raw_data__Figure_4C___WB.pdf]

# Extended data 3

## ED 3b

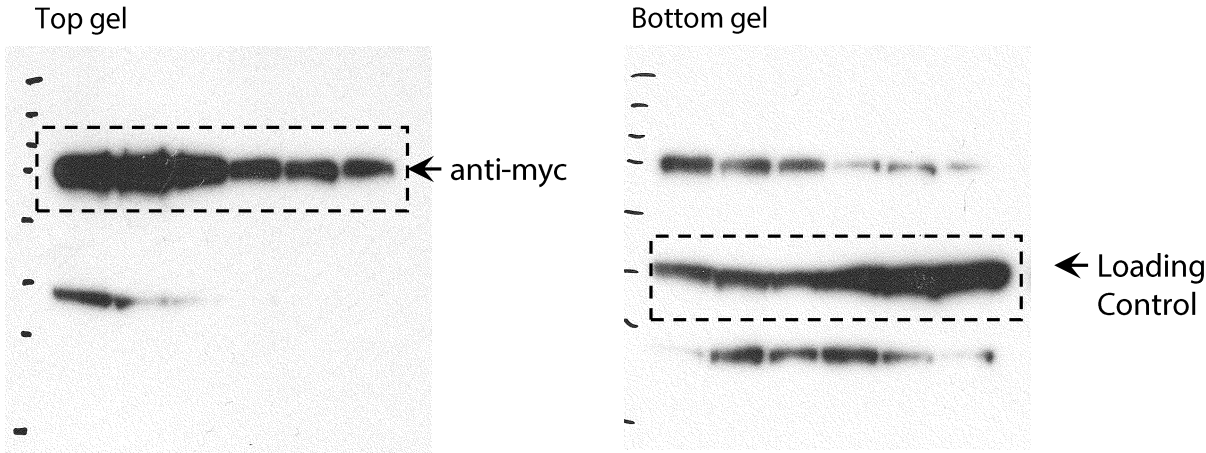

## ED 3d

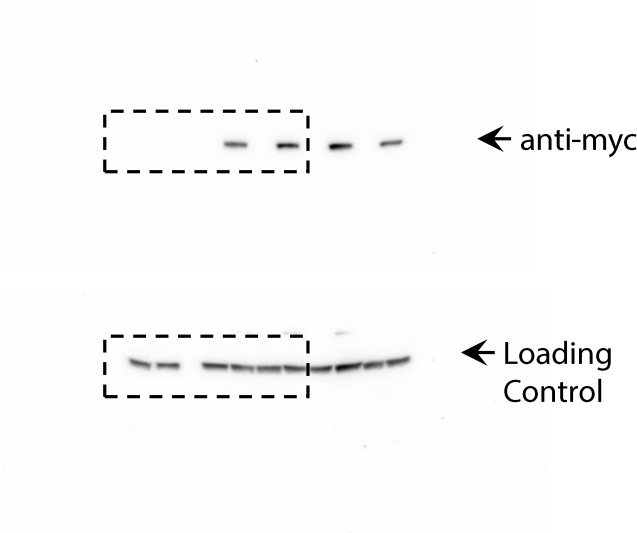

Supplement: EMS118381-supplement-Raw_data__extended_data_3___WB.pdf [file EMS118381-supplement-Raw_data__extended_data_3___WB.pdf]

# Extended Data 4b

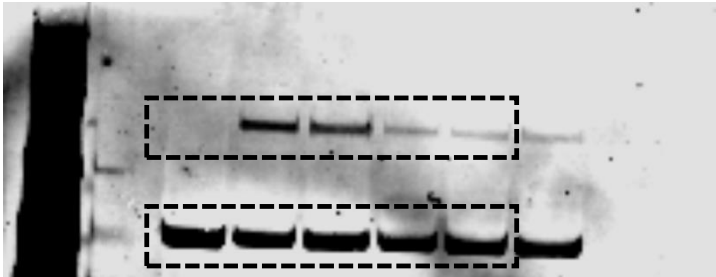

← Anti-TY

← Loading control

Supplement: EMS118381-supplement-Raw_data__extended_data_4___WB.pdf [file EMS118381-supplement-Raw_data__extended_data_4___WB.pdf]

### Extended data 7b-d

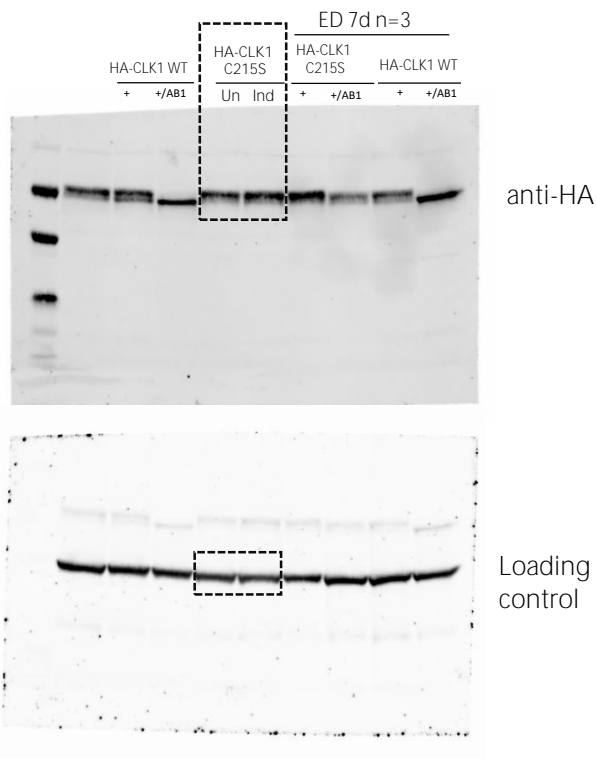

### Extended data 7d

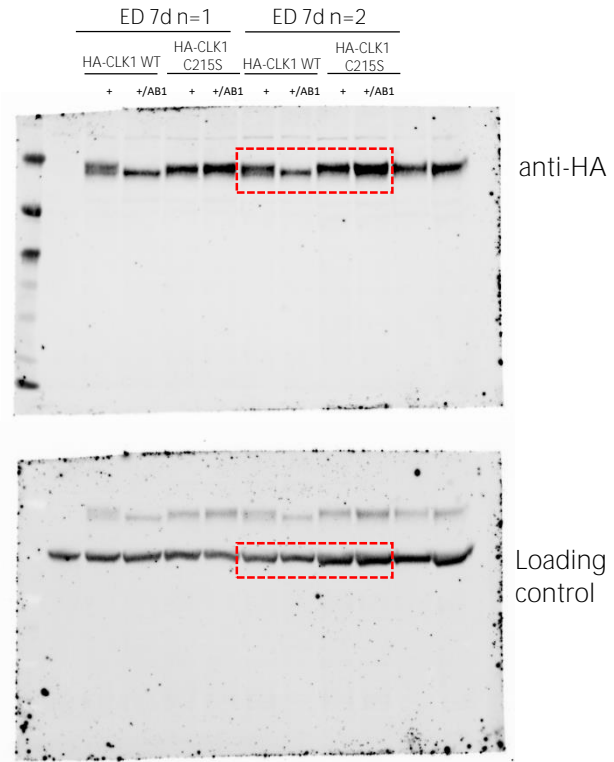

Supplement: EMS118381-supplement-Raw_data__extended_data_7___WB.pdf [file EMS118381-supplement-Raw_data__extended_data_7___WB.pdf]
